# Supplementary material for: One-PCR-tube approach for in situ DNA isolation and detection
Source: Royal Society of Chemistry journal article supplement (doi:10.1039/c1an15116a), 2011-01-01

## Supporting Information

**Figure S1** XPS results of the PCR tube before (upper) and after (lower) the treatment by chromic acid and 10% nitric acid.

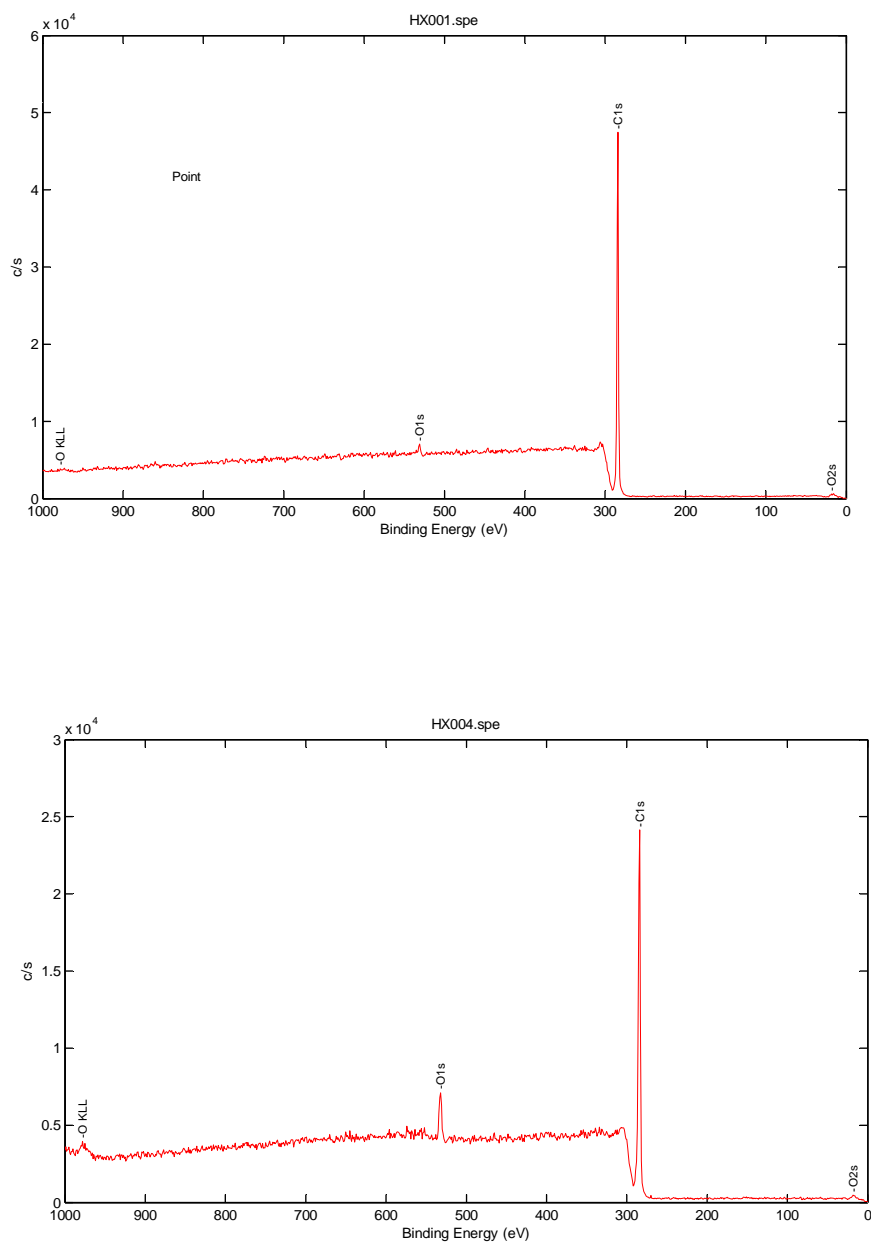

**Figure S2** Map of 35S plasmid of pBI121

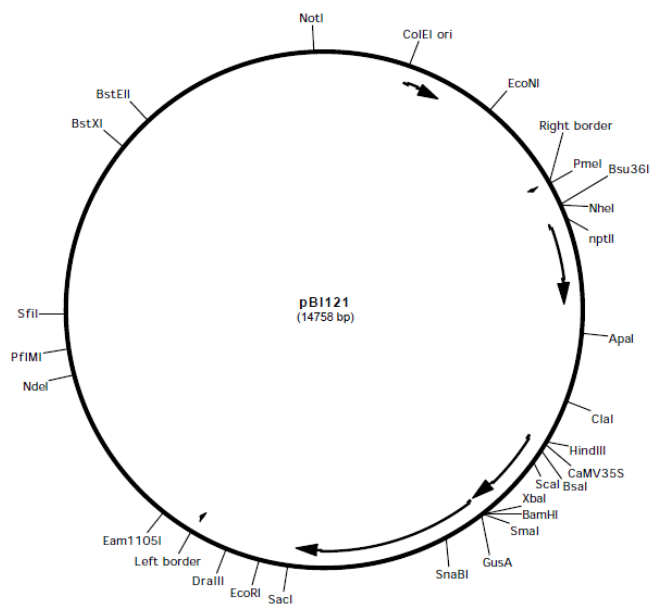

Supplement: c1an15116a.pdf [file c1an15116a.pdf]
